# Supplementary material
Source: HighWire-hosted journal article supplement (https://www.cmaj.ca/highwire/filestream/59604/field_highwire_adjunct_files/0/151437-guide-1-at.pdf)
Supplement: 151437-guide-1-at.pdf [file 151437-guide-1-at.pdf]

**Appendix 1 (as supplied by the authors): Analytic framework and key questions stages I, II and III <sup>1,2</sup>**

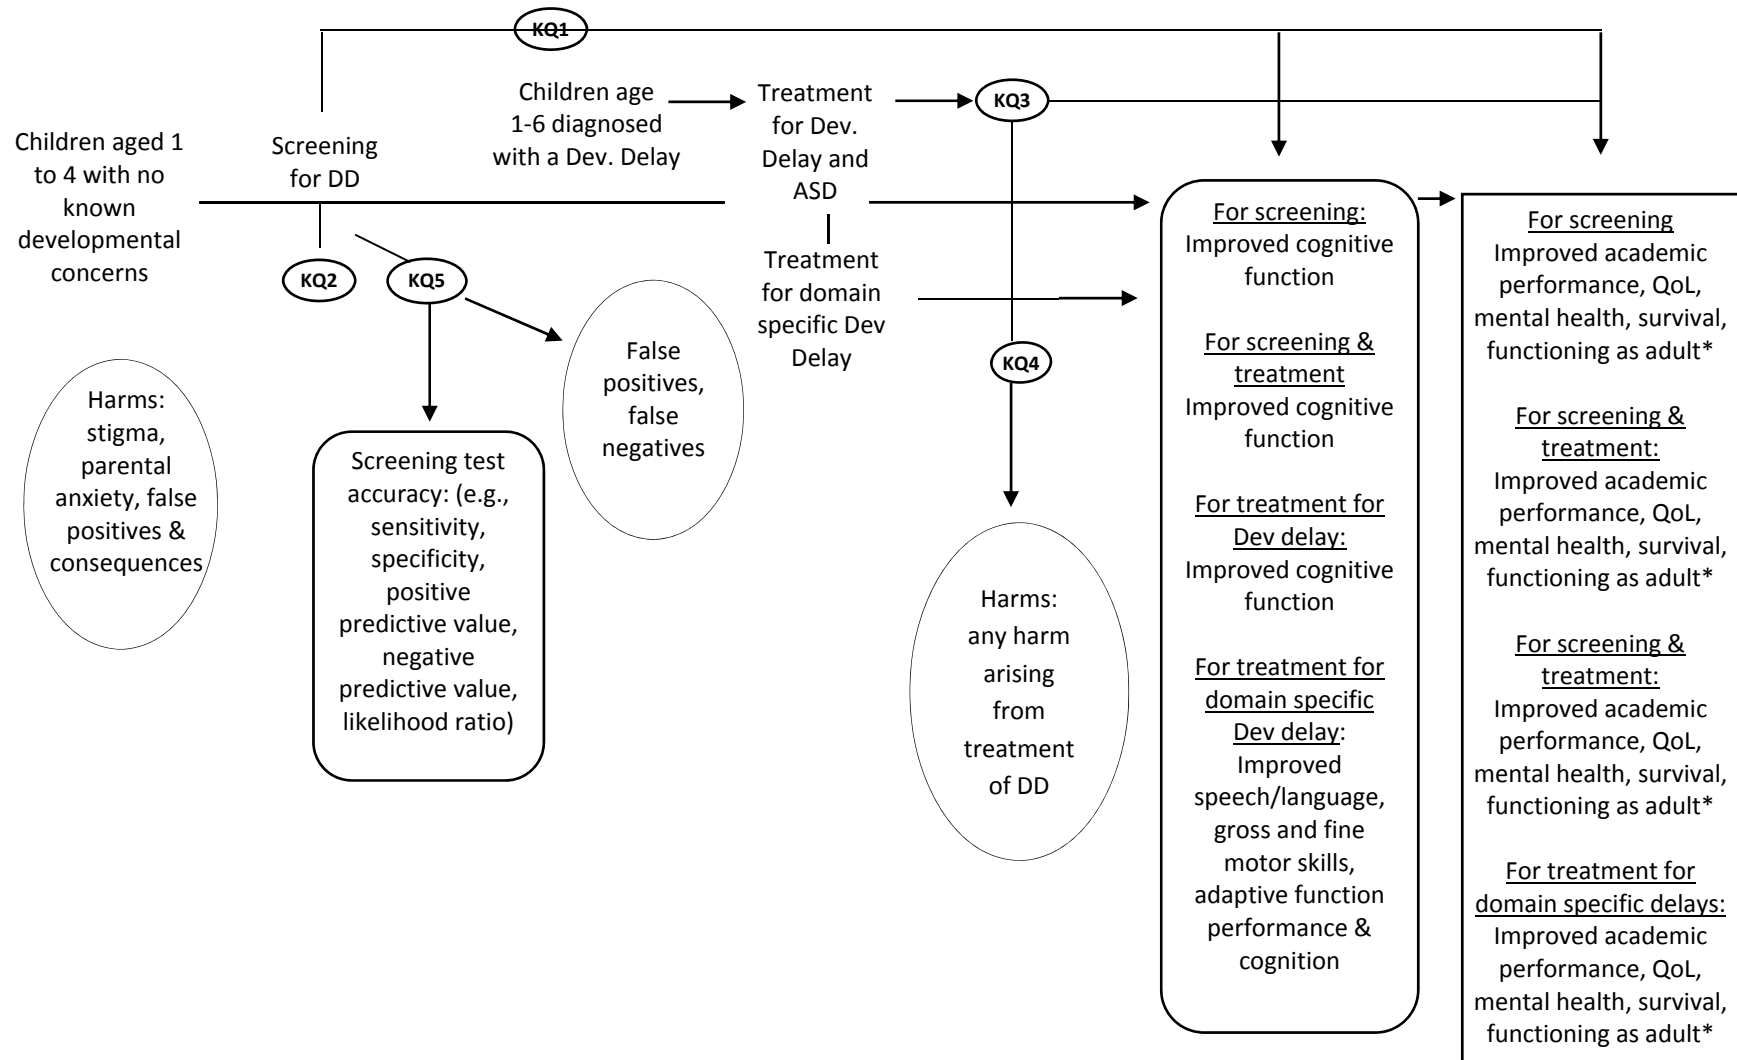

\*Functional status as an adult includes outcomes such as employment, criminality, independence.

## **Key Questions**

### **Stage I:**

1. What is the effectiveness of screening children aged 1 to 4 years without suspected developmental delay to improve outcomes?
  - a. What is the optimal interval for screening for developmental delay?
2. What is the incidence of harms of screening children aged 1 to 4 years without suspected developmental delay?

### **Stage II:**

3. What is the effectiveness of treatment for children diagnosed with developmental delay to improve outcomes?
4. What are the harms of treatment for children diagnosed with developmental delay?

### **Stage III:**

5. What is the sensitivity, specificity, positive and negative predictive values, and likelihood ratios of the various screening tests to assess developmental delay in children aged 1 to 4 years who are not already suspected of having developmental delay?

## **Contextual Questions**

1. What is the cost-effectiveness and feasibility of screening for developmental delay in preschool children aged 1 to 4 years?
2. What are parent or primary caregiver values and preferences for screening for developmental delay in preschool children aged 1 to 4 years?

What is the evidence for a higher burden of disease, a differential treatment response, differential performance of screening for developmental delay, or barriers to implementation of screening for developmental delay in subgroups? Subgroups include: Aboriginal population, rural or remote populations, low socioeconomic status, drug or alcohol dependency, or other ethnic populations.

## **References**

1. Dunfield L, Mitra D, Tonelli M, et al. Protocol: screening and treatment for developmental delay in early childhood. Calgary: Canadian Task Force on Preventive Health Care; 2014. Available: [canadiantaskforce.ca/ctfphc-guidelines/2015-developmental-delay/protocol/](http://canadiantaskforce.ca/ctfphc-guidelines/2015-developmental-delay/protocol/) (accessed 2015 Aug. 17).
2. Warren R, Kenny, M, Fitzpatrick-Lewis D, et al. Screening and treatment for developmental delay in early childhood (ages 1-4 years): a systematic review. Calgary: Canadian Task Force on Preventive Health Care; 2016. Available: [canadiantaskforce.ca/ctfphcguidelines/2015-developmental-delay/systematic-review/](http://canadiantaskforce.ca/ctfphcguidelines/2015-developmental-delay/systematic-review/) (accessed 2016 Mar. 29).
